# Supplementary material for: Amino acid-based ionic liquid surface modification of magnetic nanoparticles for the magnetic solid-phase extraction of heme proteins
Source: Royal Society of Chemistry journal article supplement (doi:10.1039/c6ra23616b), 2016-01-01
Supplement: c6ra23616b1.pdf [file c6ra23616b1.pdf]

## Supporting Information

### Amino acid-based ionic liquid surface modification on magnetic nanoparticles for the magnetic solid-phase extraction of heme proteins

Binghai Wang, Xiong Wang, Juanqiang Wang, Xue Xue, Xingjun Xi, Qiao Chu, Genlai Dong and Yun Wei\*

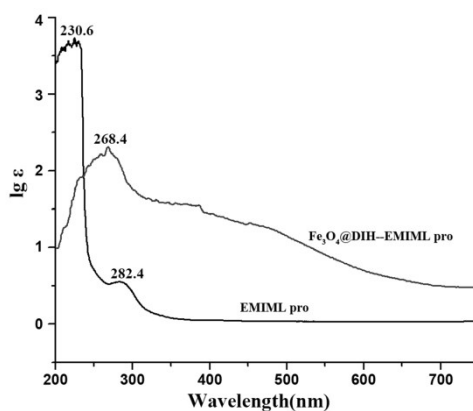

Fig. S1 Ultraviolet spectra of EMIMLpro and Fe<sub>3</sub>O<sub>4</sub>@DIH--EMIMLpro

---

\* Corresponding author: Yun WEI, State Key Laboratory of Chemical Resource Engineering, Beijing University of Chemical Technology, 15 Beisanhuan East Road, Chaoyang District, Beijing 100029, China, Tel & fax: 0086 10 64442928. E-mail: [weiyun@mail.buct.edu.cn](mailto:weiyun@mail.buct.edu.cn)

**Table S1** Various magnetic adsorbents for hemoglobin adsorption

| Material                                                               | Adsorption capacity<br>(mg/g) | Adsorption<br>time (h) | Reference    |
|------------------------------------------------------------------------|-------------------------------|------------------------|--------------|
| Cu <sup>2+</sup> -IDA-SiO <sub>2</sub> -Fe <sub>3</sub> O <sub>4</sub> | 418.6                         | 5                      | [1]          |
| Hb magnetic molecularly<br>imprinted polymers                          | 10.5                          | 1                      | [2]          |
| Fe <sub>3</sub> O <sub>4</sub> @DIH--EMIMLpro                          | 1580                          | 0.25                   | in this work |

### References

- 1 M. Zhang, D. Cheng, X. W. He, L. X. Chen, Y. K. Zhang, *Chem. Asian J*, 2010, 5, 1332-1340.
- 2 X. W. Kan, Q. Zhao, D. L. Shao, Z. R. Geng, Z. L. Wang, J. J. Zhu, *J. Phys. Chem. B.*, 2010, 114, 3999-4004.
